# Supplementary material for: The characteristics of physicians disciplined by professional colleges in Canada
Source: PubMed Central journal article supplement — Open Med. 2011 Oct 11;5(4):e166–72. (PMC3345379), 2011-10-11
Supplement: OpenMed-05-e166-s001.pdf [file OpenMed-05-e166-s001.pdf]

**Appendix A: Provincial medical licensing authorities in Canada**

| <b>Province</b>         | <b>Licensing authority</b>                                                                 |
|-------------------------|--------------------------------------------------------------------------------------------|
| Newfoundland & Labrador | College of Physicians and Surgeons of Newfoundland and Labrador                            |
| Nova Scotia             | College of Physicians & Surgeons of Nova Scotia                                            |
| New Brunswick           | College of Physicians and Surgeons of New Brunswick                                        |
| Prince Edward Island    | College of Physicians and Surgeons of Prince Edward Island                                 |
| Quebec                  | Collège des médecins du Québec                                                             |
| Ontario                 | College of Physicians and Surgeons of Ontario                                              |
| Manitoba                | College of Physicians & Surgeons of Manitoba                                               |
| Saskatchewan            | College of Physicians and Surgeons of Saskatchewan                                         |
| Alberta                 | College of Physicians & Surgeons of Alberta                                                |
| British Columbia        | College of Physicians & Surgeons of British Columbia                                       |
| Yukon                   | Yukon Medical Council                                                                      |
| Northwest Territories   | Government of the Northwest Territories                                                    |
| Nunavut                 | Professional Licensing, Department of Health and Social Services,<br>Government of Nunavut |
